# Supplementary material for: SNP-SNP interactions in breast cancer susceptibility
Source: Springer Nature journal article supplement (doi:10.1186/1471-2407-6-114), 2006-05-03

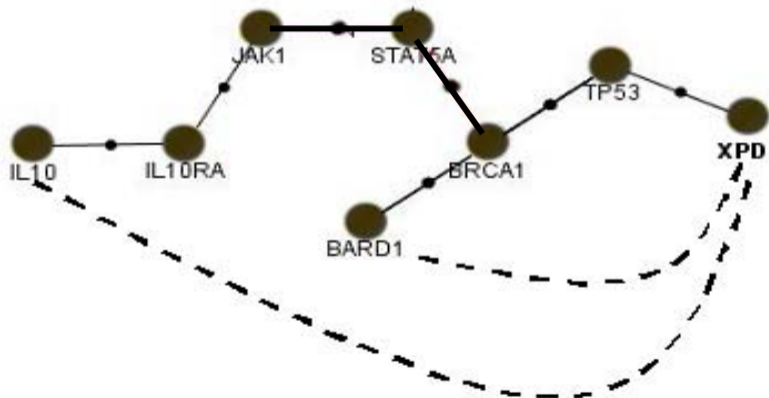

Supplement: 12885_2005_466_MOESM3_ESM.pdf [file 12885_2005_466_MOESM3_ESM.pdf]
